# Supplementary material for: PTEN-negative endometrial cancer cells protect their genome through enhanced DDB2 expression associated with augmented nucleotide excision repair
Source: BMC Cancer. 2023 May 4;23:399. doi: 10.1186/s12885-023-10892-5 (PMC10157935; doi:10.1186/s12885-023-10892-5)
Supplement: Supplementary file 1 — Supplementary Material 1 [file 12885_2023_10892_MOESM1_ESM.xlsx]

## Sheet: Sheet1
Supplementary Table 1: mRNA expression and significance values of DDR genes related to Figure 1A
	Gene	Log2 ratio (altered PTEN mean expression/unaltered PTEN mean expression)	q-Value (significance)
1	DDB2	0.120501	8.24e-11
2	ZSWIM7	0.108422	1.23e-10
3	NUDT18	0.169267	3.65e-09
4	NEIL1	0.211865	6.62e-09
5	ALKBH3	-0.247698	8.58e-09
6	FANCE	-0.119961	5.18e-07
7	RFC4	-0.117905	8.19e-07
8	TTK	-0.152003	3.9e-06
9	RMI2	-0.11243	3.99e-06
10	IDH1	0.0769289	4.3e-06
11	TOPBP1	-0.0750433	6.98e-06
12	RAD51D	0.0777868	2.69e-05
13	NEIL2	0.0815299	3.21e-05
14	GTF2H4	-0.0418651	5.86e-05
15	RAD51B	0.0856382	5.94e-05
16	MLH1	-0.137338	6.22e-05
17	MDC1	-0.0542771	7.38e-05
18	MSH6	-0.0632989	8.1e-05
19	CDC25C	-0.12004	9.44e-05
20	RAD9B	-0.147845	0.000121
21	RAD23A	-0.0397667	0.000371
22	YWHAB	-0.0423315	0.00054
23	RFC5	-0.0585422	0.000545
24	FAAP24	-0.141929	0.000834
25	RECQL5	-0.052413	0.00096
26	RNMT	-0.0425246	0.000964
27	GADD45G	0.121841	0.000998
28	SMC6	-0.0625211	0.001
29	EXO5	-0.0727563	0.00103
30	TOP3A	0.0446998	0.00108
31	AEN	-0.207706	0.00249
32	NEIL3	0.0737169	0.00519
33	GTF2H5	-0.0369547	0.00634
34	MBD4	-0.0404666	0.0101
35	SMC5	-0.0499144	0.0122
36	CDC25A	0.033423	0.014
37	CDC25B	0.034611	0.0228
38	CCNH	0.0281753	0.0569
39	STRA13	0.0352971	0.0681
40	NHEJ1	-0.0249978	0.0702
41	EME1	-0.0573061	0.076
42	PARPBP	-0.058646	0.0792
43	XRCC4	-0.0477326	0.0822
44	FANCL	-0.0366142	0.0887
45	DNA2	-0.0595646	0.0909
46	REV1	0.0235099	0.0934
47	ASCC3	0.0305021	0.0944
48	INO80	0.0170919	0.0968
49	RAD51	-0.0501522	0.101
50	HMGB1	-0.0239789	0.102
51	ERCC5	0.0207372	0.106
52	FANCF	0.0411052	0.106
53	ERCC2	0.027924	0.108
54	BRIP1	-0.0804498	0.114
55	PARP2	-0.0198085	0.115
56	TCEA1	-0.0258238	0.115
57	RFC3	-0.039109	0.12
58	RBX1	0.0180079	0.12
59	UBE2V2	-0.0327368	0.12
60	XRCC6	0.0114682	0.122
61	RRM2	-0.0399746	0.123
62	LIG3	0.0201346	0.124
63	FANCG	-0.0241933	0.13
64	BCAS2	-0.0205089	0.136
65	APITD1	0.0305249	0.138
66	HES1	-0.027906	0.141
67	PPP4R1	-0.0150925	0.143
68	SHFM1	0.0212625	0.147
69	RFC1	-0.0211277	0.153
70	POLA1	-0.0260892	0.153
71	CETN2	0.0270429	0.159
72	RPA1	0.0161197	0.167
73	XAB2	0.0220858	0.168
74	XRCC3	-0.0295779	0.169
75	DCLRE1B	-0.0239075	0.173
76	RAD23B	0.0151201	0.19
77	MAD2L2	-0.0231067	0.191
78	POLE2	-0.0466178	0.202
79	HLTF	-0.0314325	0.203
80	RAD52	-0.0306316	0.205
81	CDK7	0.0230047	0.23
82	POLE	-0.0198604	0.23
83	ENDOV	-0.0399981	0.234
84	PLK3	-0.02864	0.235
85	CUL3	-0.0110025	0.236
86	ERCC1	0.0144127	0.238
87	POLD1	-0.0225646	0.255
88	FAAP100	-0.0175693	0.255
89	SLX1B	-0.0249944	0.262
90	MMS19	-0.0137009	0.263
91	TCEB3	-0.0128367	0.272
92	UBE2T	-0.0266864	0.273
93	RTEL1	-0.0213737	0.281
94	TYMS	-0.027539	0.281
95	POLH	-0.0159239	0.282
96	DUT	0.0166089	0.283
97	CUL4A	-0.0134832	0.286
98	RFC2	-0.0134902	0.288
99	GTF2H2	0.0186157	0.302
100	RNF169	-0.0215332	0.303
101	LIG1	-0.0157987	0.308
102	DDB1	-0.00807588	0.312
103	FANCM	-0.0284824	0.315
104	CLK2	-0.0155815	0.316
105	NSMCE3	0.021645	0.321
106	WDR48	0.0117772	0.323
107	TDP1	0.012824	0.335
108	MUTYH	-0.0170533	0.343
109	LIG4	0.0315787	0.348
110	RAD9A	-0.0197407	0.35
111	MNAT1	0.017278	0.366
112	APEX2	0.0131221	0.367
113	REV3L	0.0210178	0.37
114	UVSSA	0.0257454	0.378
115	SMARCA4	-0.0122783	0.389
116	NUDT1	-0.0183998	0.39
117	PNKP	0.0130825	0.398
118	FANCC	0.0121894	0.401
119	CHAF1A	0.0154631	0.405
120	APEX1	0.00964211	0.408
121	UBE2A	0.0112932	0.416
122	NSMCE1	0.0109089	0.439
123	ALKBH2	-0.0151069	0.446
124	POLG	0.0102371	0.446
125	ATR	0.0108532	0.447
126	NFATC2IP	-0.01201	0.452
127	RAD51C	-0.0127754	0.466
128	NBN	-0.0149814	0.468
129	PMS2	0.00913101	0.471
130	FAN1	0.0136104	0.473
131	RPA2	-0.00883285	0.478
132	POLL	0.0104815	0.487
133	GTF2H3	-0.0206693	0.513
134	FANCI	-0.01201	0.527
135	SLX4	0.0122783	0.532
136	MUS81	-0.00921853	0.536
137	TELO2	0.0097905	0.548
138	H2AFX	-0.0102501	0.558
139	ATRIP	0.0105951	0.57
140	PER1	-0.0146303	0.57
141	PARP4	0.0080899	0.575
142	PCNA	-0.00913514	0.581
143	HELQ	0.0100118	0.589
144	MLH3	0.0085115	0.595
145	RRM2B	0.0149848	0.601
146	PLRG1	0.00606175	0.609
147	POLD4	0.00861313	0.617
148	PARG	-0.0100188	0.625
149	TDP2	-0.00781104	0.638
150	MPLKIP	-0.00976998	0.642
151	CUL5	0.00972607	0.647
152	SHPRH	-0.0188317	0.657
153	HERC2	0.00533344	0.67
154	KAT5	-0.00714561	0.691
155	RNF4	0.00407733	0.694
156	DCLRE1C	-0.00909074	0.695
157	RNF8	0.00621852	0.7
158	FEN1	-0.00866486	0.702
159	POLD2	-0.00500502	0.718
160	BRCC3	0.00476399	0.738
161	PARP3	0.00849146	0.739
162	MORF4L1	-0.00386955	0.741
163	NTHL1	-0.00767801	0.748
164	SMARCAD1	0.00794875	0.749
165	ATM	0.00632069	0.75
166	POLE3	0.00423285	0.752
167	ERCC4	-0.0102247	0.755
168	RPA3	-0.00534002	0.768
169	NSMCE4A	-0.00488222	0.77
170	HUS1	-0.00526212	0.772
171	RRM1	0.00720989	0.773
172	WEE1	0.00751014	0.774
173	PMS1	0.00723157	0.775
174	POLE4	0.00475353	0.783
175	SWI5	-0.00492108	0.792
176	SOX4	-0.00581498	0.798
177	SMARCC1	-0.0037008	0.802
178	DCLRE1A	-0.00526212	0.805
179	PTEN	0.00557026	0.806
180	TDG	0.00458727	0.817
181	POLD3	-0.00335901	0.835
182	ATRX	0.00435641	0.851
183	YWHAG	0.00243905	0.851
184	ERCC8	0.0041044	0.854
185	RAD50	0.00304366	0.863
186	PPP4R2	-0.00548902	0.863
187	SPRTN	0.00383186	0.865
188	PARP1	-0.00243083	0.87
189	FAM175A	-0.00636952	0.876
190	UIMC1	0.00167269	0.878
191	FAAP20	-0.00287963	0.886
192	RBBP8	0.00300562	0.89
193	TOP3B	0.00312949	0.907
194	TCEB2	-0.00235927	0.92
195	BRCA1	0.00364778	0.925
196	RAD17	-0.00166497	0.925
197	XRCC1	-0.00140136	0.939
198	GTF2H1	0.00163109	0.941
199	FANCA	0.00165922	0.949
200	PRPF19	-0.00121798	0.957
201	PPP4C	0.00121184	0.965
202	MSH3	-0.00173089	0.988
203	ERCC6	0	0.988
204	APLF
205	APTX
206	DNTT
207	MRE11A
208	POLB
209	POLM
210	PRKDC
211	RNF168
212	TP53BP1
213	XRCC2
214	XRCC5
215	EXO1
216	MSH2
217	RPA4
218	ALKBH1
219	BARD1
220	BLM
221	BRCA2
222	BRE
223	CHEK1
224	CHEK2
225	DMC1
226	EID3
227	EME2
228	ERCC3
229	FANCB
230	FANCD2
231	GADD45A
232	GEN1
233	HFM1
234	HMGB2
235	MGMT
236	MPG
237	MRPL40
238	NABP2
239	NSMCE2
240	NUDT15
241	OGG1
242	PALB2
243	PAXIP1
244	POLI
245	POLK
246	POLN
247	POLQ
248	PPP4R4
249	RAD1
250	RAD18
251	RAD54B
252	RAD54L
253	RDM1
254	RECQL
255	RECQL4
256	RIF1
257	RMI1
258	SETMAR
259	SLX1A
260	SMUG1
261	SPO11
262	SWSAP1
263	TCEB1
264	TP53
265	TREX1
266	TREX2
267	UBE2B
268	UBE2N
269	UNG
270	USP1
271	WRN
272	XPA
273	XPC
274	CDC5L
275	YWHAE
276	BABAM1
